# Supplementary material for: MICOS Complex Loss Governs Age-Associated Murine Mitochondrial Architecture and Metabolism in the Liver, While Sam50 Dictates Diet Changes
Source: PubMed Central journal article supplement (PMC11230271; doi:10.1101/2024.06.20.599846), 2024-07-03

SFigure 1

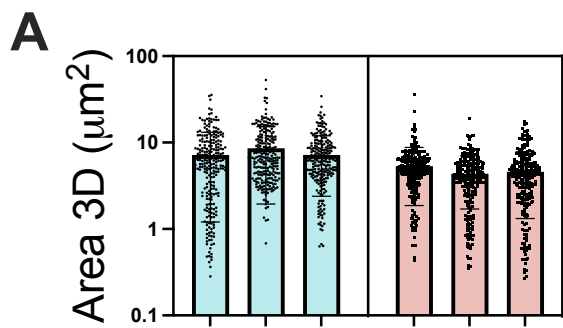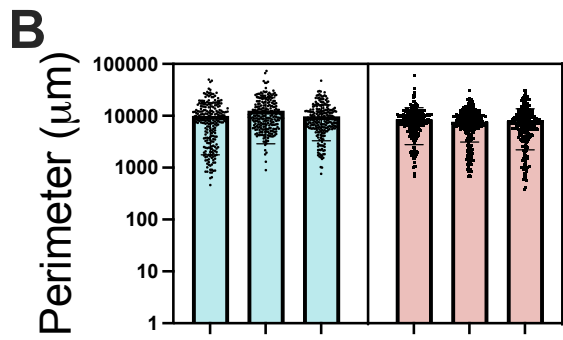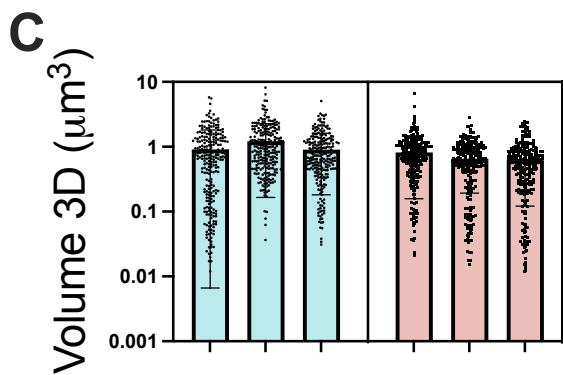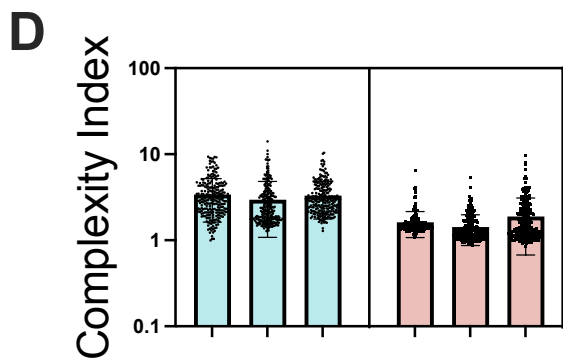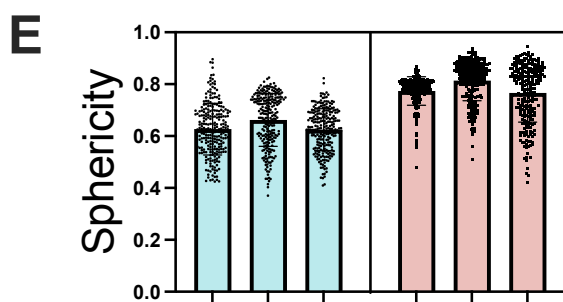

**Figure 2**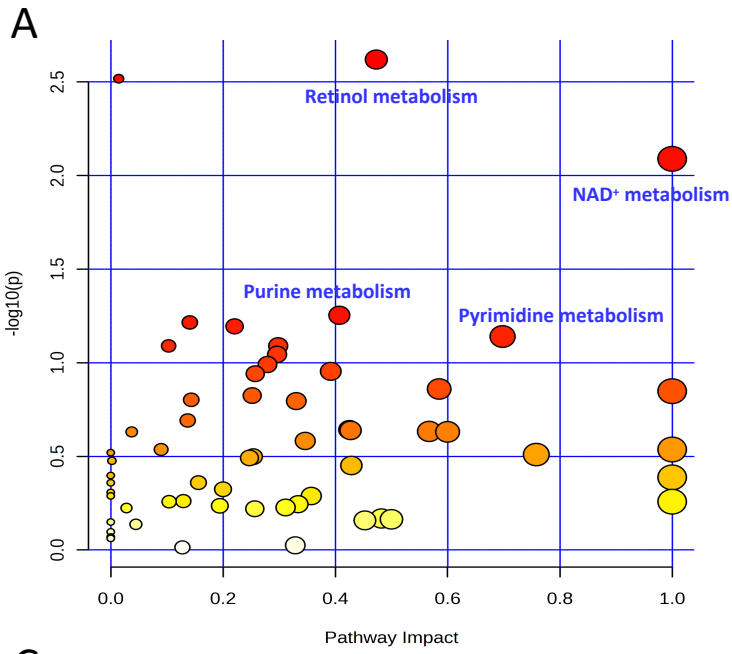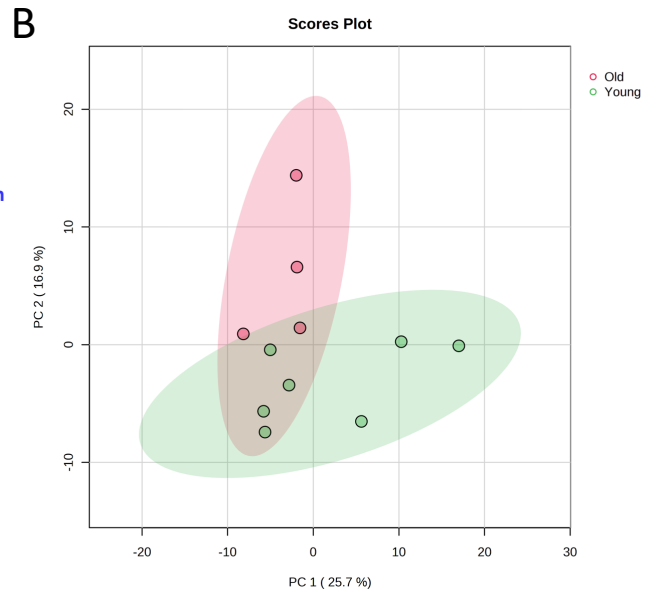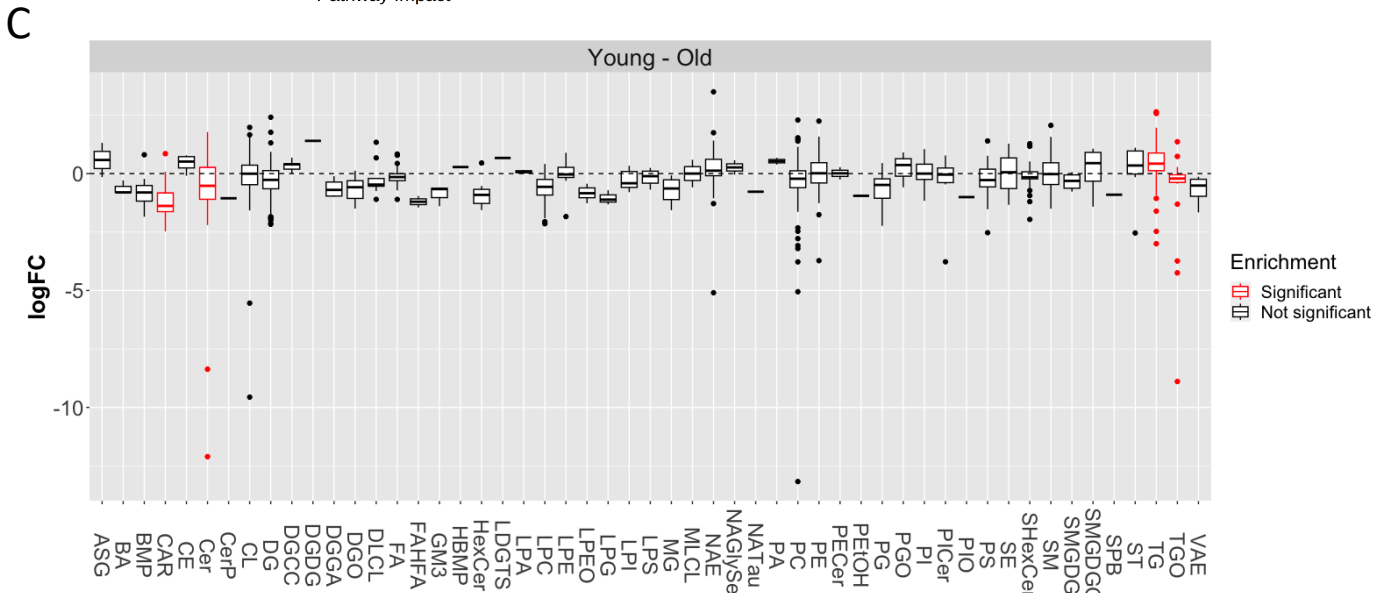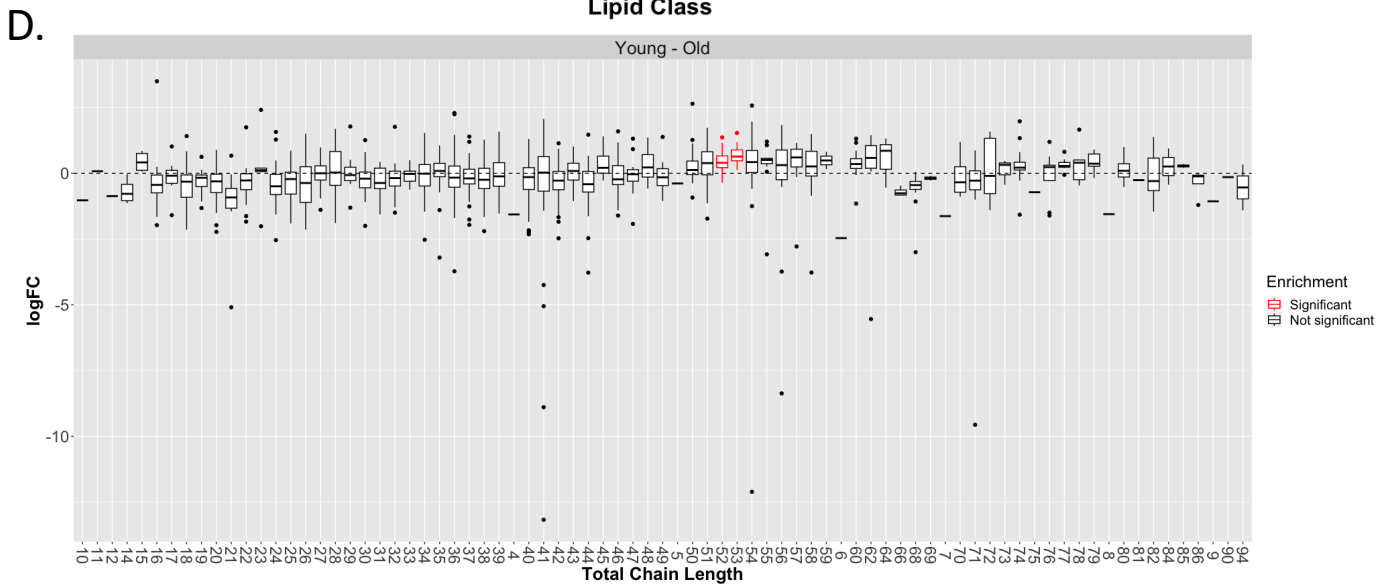

SFigure 3

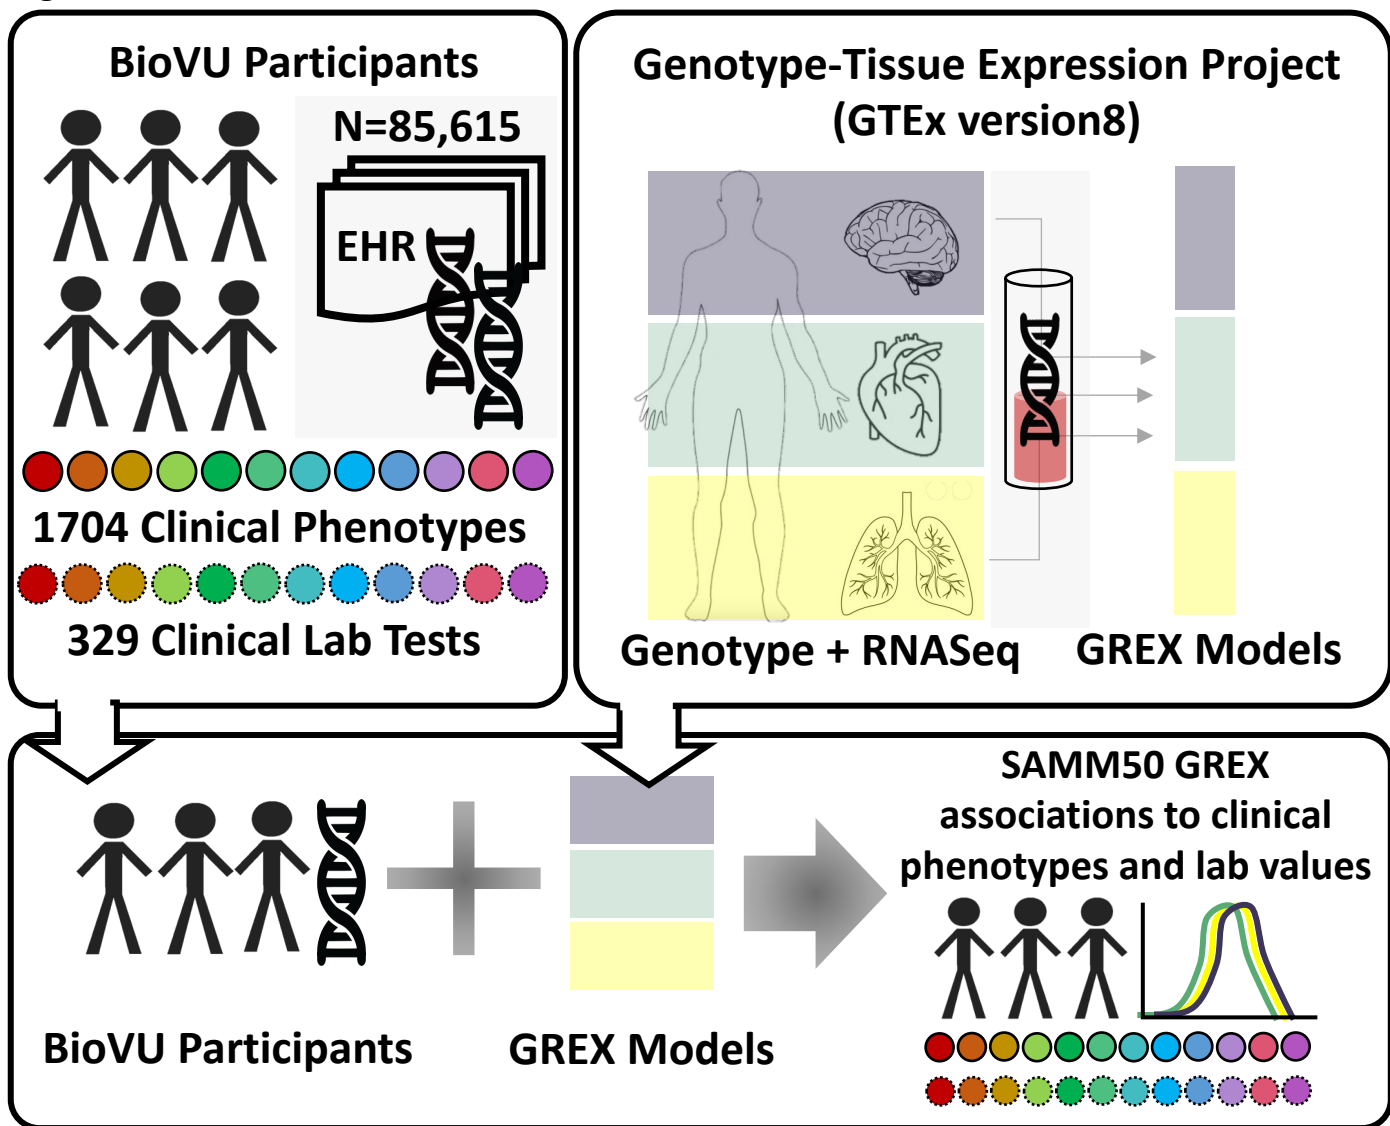

Supplement: media-1.pdf [file media-1.pdf]
